# Supplementary material for: Colorimetric response to anions by a “robust” copper(ii) complex of a [9]aneN3 pendant arm derivative: CN− and I− selective sensing
Source: Royal Society of Chemistry journal article supplement (doi:10.1039/c0cc04500d), 2011-01-01
Supplement: c0cc04500d.pdf [file c0cc04500d.pdf]

# Colorimetric response to anions by a “robust” copper(II) complex of a [9]aneN<sub>3</sub> pendant arm derivative: CN<sup>-</sup> and I<sup>-</sup> selective sensing

M. Aguado Tetilla, M. C. Aragoni, M. Arca, C. Caltagirone, C. Bazzicalupi, A. Bencini, A. Garau, F. Isaia, A. Laguna, V. Lippolis, V. Meli

## Electronic Supplementary Information

### Experimental details

All melting points are uncorrected. Microanalytical data were obtained using a Fisons EA CHNS-O instrument (T = 1000°C). UV-Vis spectra were recorded on a Thermo Nicolet Evolution 300 spectrophotometer. Spectrophotometric titrations in MeCN and H<sub>2</sub>O of the complex [CuL](BF<sub>4</sub>)<sub>2</sub>·MeCN (**1**) with anions were performed by adding to a solution of **1** (2.5 mL) increasing volumes (μL) of a solution the anion (0.14 M) in the same solvent as a <sup>n</sup>Bu<sub>4</sub>N<sup>+</sup> salt (F<sup>-</sup>, Cl<sup>-</sup>, Br<sup>-</sup>, I<sup>-</sup>, MeCO<sub>2</sub><sup>-</sup>, PhCO<sub>2</sub><sup>-</sup>, H<sub>2</sub>PO<sub>4</sub><sup>-</sup>, HSO<sub>4</sub><sup>-</sup>, NO<sub>3</sub><sup>-</sup>, N<sub>3</sub><sup>-</sup>, CN<sup>-</sup> and SCN<sup>-</sup>) or a Et<sub>4</sub>N<sup>+</sup> salt (HCO<sub>3</sub><sup>-</sup>). All solvents and starting materials were purchased from commercial sources where available. 1-(2-quinolinylmethyl)-1,4,7-triazacyclononane (**L**) was prepared following a literature procedure<sup>1</sup>. Solvents and starting materials were purchased from commercial sources where available.

<sup>1</sup> M. Mameli, M. C. Aragoni, M. Arca, M. Atzori, A. Bencini, C. Bazzicalupi, A. J. Blake, C. Caltagirone, F. A. Devillanova, A. Garau, M. B. Hursthouse, F. Isaia, V. Lippolis and B. Valtancoli, *Inorg. Chem.*, 2009, **48**, 9236

### Synthesis of [CuL](BF<sub>4</sub>)<sub>2</sub>·MeCN (**1**)

A solution of Cu(BF<sub>4</sub>)<sub>2</sub>·xH<sub>2</sub>O (3.40 mg, 0.014 mmol) in MeCN (5 mL) was added to a solution of 1-(2-quinolinylmethyl)-1,4,7-triazacyclononane (**L**) (3.87 mg, 0.014 mmol) in MeCN (5 mL). The resulting blue solution was stirred at room temperature for one hour. The solvent volume was then reduced to 3 mL under reduced pressure. The product was isolated as a blue powder after Et<sub>2</sub>O vapours diffusion into the concentrated MeCN solution (5 mg, 9.11 × 10<sup>-3</sup> mmol, 35% yield). Mp. 155°C (decomp.). Elemental analysis: found (calculated for C<sub>18</sub>H<sub>25</sub>B<sub>2</sub>CuF<sub>8</sub>N<sub>5</sub>): C 39.37 (39.41); H 4.63 (4.59); N 12.78 (12.77). UV-Vis: λ/nm (ε/M<sup>-1</sup>cm<sup>-1</sup>): 600 (106) in MeCN; 634 (78) in H<sub>2</sub>O.

### Synthesis of [Cu(L)CN]BF<sub>4</sub>·½H<sub>2</sub>O

To a solution of [CuL](BF<sub>4</sub>)<sub>2</sub>·MeCN (**1**) (5.00 mg, 9.11 × 10<sup>-3</sup> mmol) in MeCN (5mL) <sup>n</sup>Bu<sub>4</sub>NCN was added (2.44 mg, 9.11 × 10<sup>-3</sup> mmol) as a solid. The solution turned dark blue immediately after the addition. Dark blue crystals were obtained by slow evaporation of the solution (1.87 mg, 4.10 ×

$10^{-3}$  mmol, 54% yield). Mp. 187°C (decomp.). Elemental analysis found (calculated for  $C_{17}H_{23}BCuF_4N_5O_{0.5}$ ): C 44.86 (44.80); H 5.13 (5.09); N 15.39 (15.37). UV-Vis:  $\lambda/nm$  ( $\epsilon/M^{-1}cm^{-1}$ ): 585 (144) in MeCN; 595 (97) in  $H_2O$ .

### **Synthesis of [Cu(L)]I**

To a solution of [CuL](BF<sub>4</sub>)<sub>2</sub>·MeCN (1) (5.00 mg,  $9.11 \times 10^{-3}$  mmol) in MeCN (5mL) <sup>n</sup>Bu<sub>4</sub>NI was added (6.74 mg, 0.019 mmol) as a solid. The solution turned green immediately after the addition. Green crystals were obtained by diffusion of Et<sub>2</sub>O vapours in the solution (3.10 mg,  $5.28 \times 10^{-3}$  mmol, 58% yield) Mp. 178 (decomp.). Elemental analysis found (calculated for  $C_{16}H_{22}CuI_2N_4$ ): C 32.74 (32.70); H 3.79 (3.77); N 9.51 (9.53). UV-Vis:  $\lambda/nm$  ( $\epsilon/M^{-1}cm^{-1}$ ): 630 (330), 420 (1330) in MeCN; 627 (85), 390 (156) in  $H_2O$ .

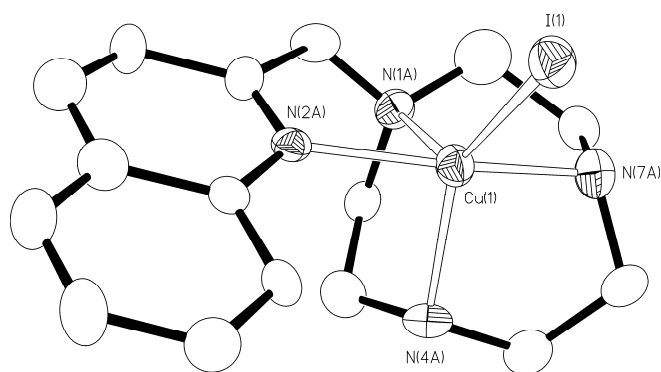

**Figure S1.** ORTEP view of the complex cation  $[\text{CuL(I)}]^+$  in  $[\text{Cu(L)I}]\text{I}$ . Hydrogen atoms have been omitted for clarity. Displacement ellipsoids are drawn at a 30% probability level. Cu(1)-I(1) 2.583(2), Cu(1)-N(2A) 2.008(14), Cu(1)-N(7A) 2.013(15), Cu(1)-N(1A) 2.120(13), Cu(1)-N(4A) 2.156(13) Å, N(2A)-Cu(1)-N(7A) 164.6(6), N(2A)-Cu(1)-N(1A) 79.6(6), N(7A)-Cu(1)-N(1A) 85.0(6), N(2A)-Cu(1)-N(4A) 93.6(6), N(7A)-Cu(1)-N(4A) 83.7(6), N(1A)-Cu(1)-N(4A) 84.7(6), N(2A)-Cu(1)-I(1) 97.8(4), N(7A)-Cu(1)-I(1) 93.6(4), N(1A)-Cu(1)-I(1) 133.4(5), N(4A)-Cu(1)-I(1) 141.6(4)°.

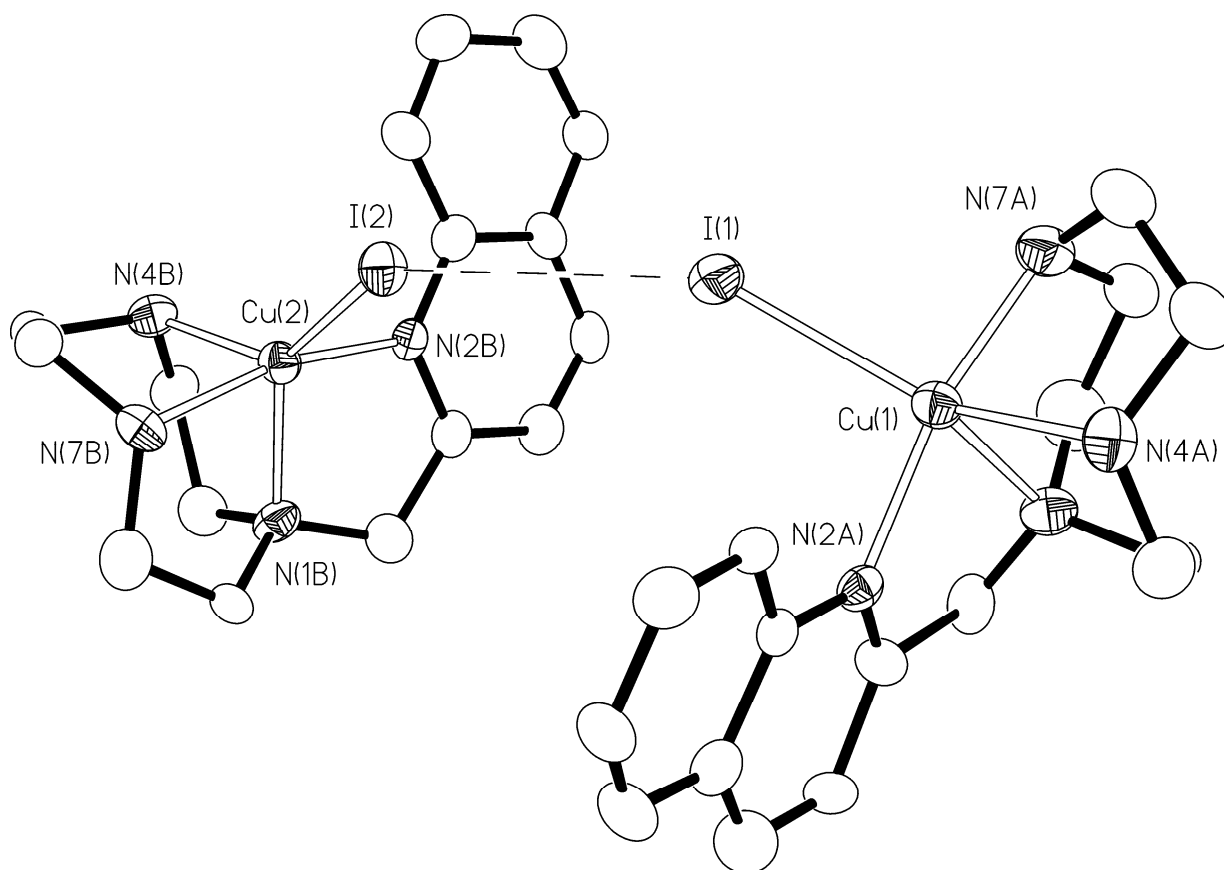

**Figure S2.** ORTEP view of two independent  $[\text{Cu}(\text{L})\text{I}]^+$  cations interacting *via* a soft-soft I...I contact. Hydrogen atoms are omitted for clarity. Displacement ellipsoids are drawn at a 30% probability level. I(1)-I(2), 4.140(2), Cu(2)-I(2) 2.584(2), Cu(2)-N(7B) 1.974(14), Cu(2)-N(2B) 1.999(14), Cu(2)-N(1B) 2.095(14), Cu(2)-N(4B) 2.118(14) Å, N(7B)-Cu(2)-N(2B) 165.3(6), N(7B)-Cu(2)-N(1B) 84.1(6), N(2B)-Cu(2)-N(1B) 81.2(6), N(7B)-Cu(2)-N(4B) 83.7(6), N(2B)-Cu(2)-N(4B) 95.2(6), N(1B)-Cu(2)-N(4B) 85.2(6), N(7B)-Cu(2)-I(2) 93.5(4), N(2B)-Cu(2)-I(2) 97.1(4), N(1B)-Cu(2)-I(2) 136.8(4), N(4B)-Cu(2)-I(2) 137.5(4)°. I(2)-I(1)-Cu(1) 146.25, I(1)-I(2)-Cu(2) 144.66.

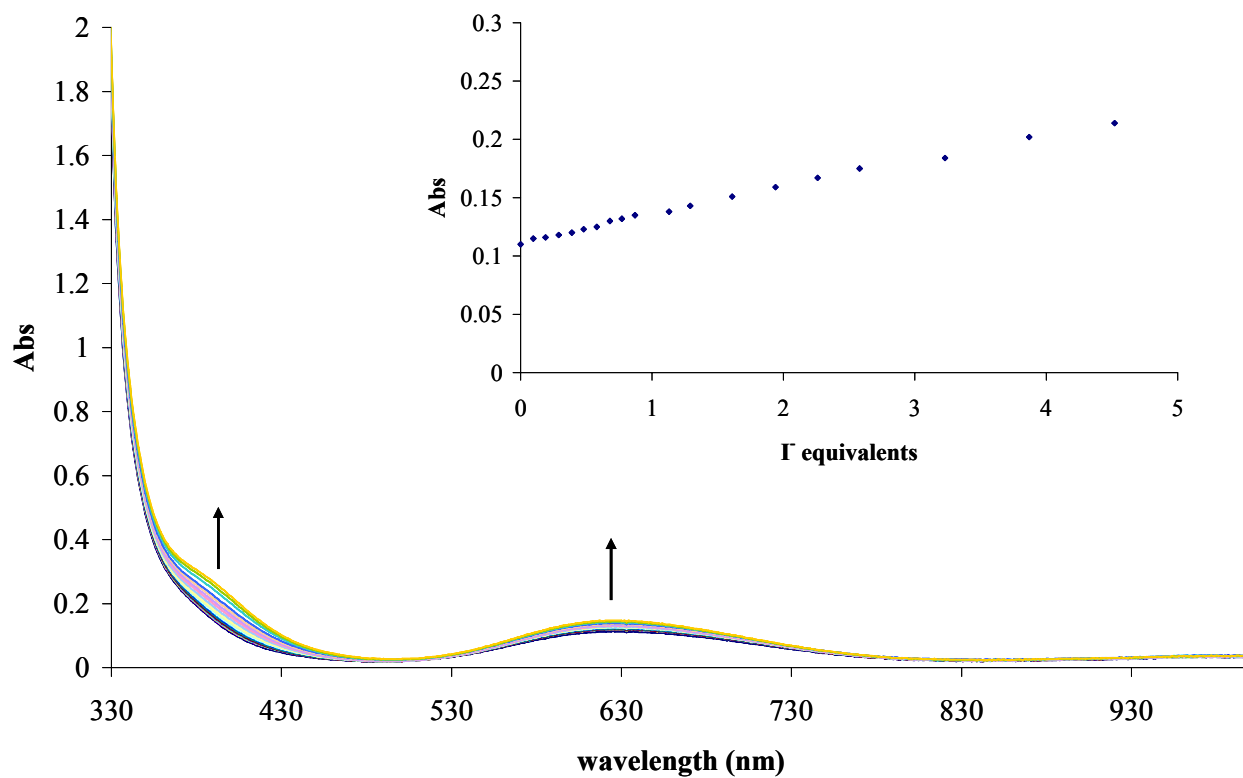

**Figure S3.** Absorption changes of **1** ( $1.72 \times 10^{-3}$  M) in H<sub>2</sub>O upon addition of increasing amounts of nBu<sub>4</sub>NI (0.14 M). Inset: titration curve at 390 nm.

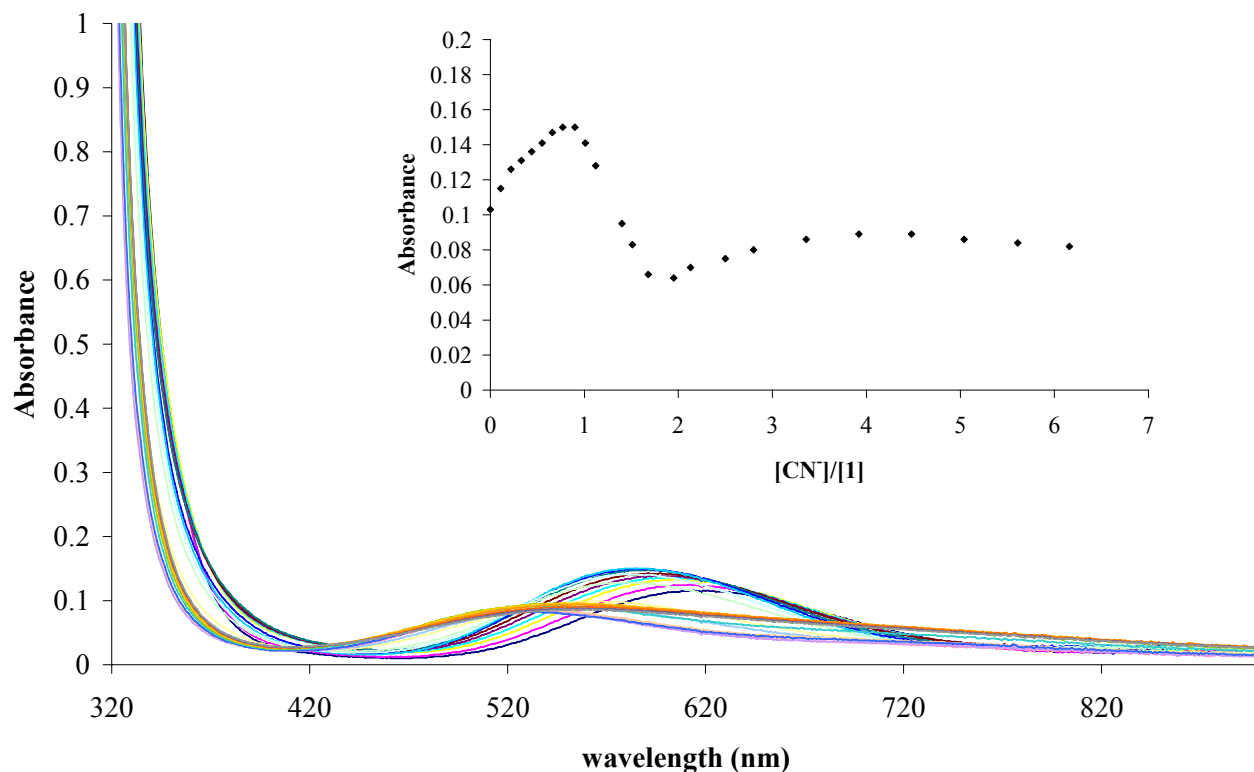

**Figure S4.** Absorption changes of **1** ( $1.00 \times 10^{-3}$  M) in MeCN upon addition of increasing amounts of <sup>n</sup>Bu<sub>4</sub>NCN (0.14 M). Inset: titration curve at 585 nm.

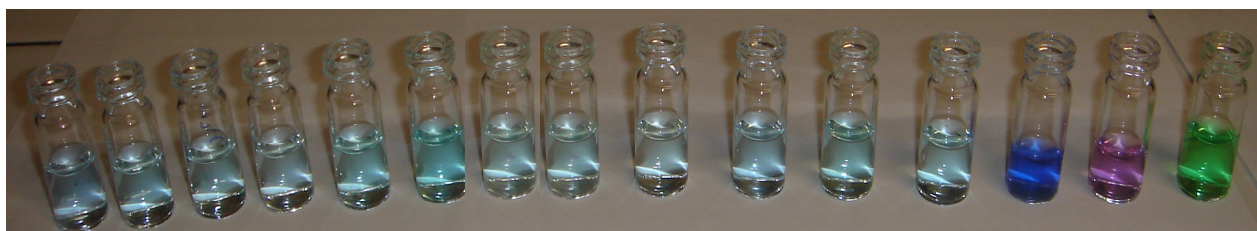

**Figure S5.** Colour change of **1** ( $1.00 \times 10^{-3}$  M) after addition of different anions in MeCN. From left to right: **1**, **1** + 1 eq. of F<sup>-</sup>, **1** + 1 eq. of Cl<sup>-</sup>, **1** + 1 eq. of Br<sup>-</sup>, **1** + 1 eq. of MeCO<sub>2</sub><sup>-</sup>, **1** + 1 eq. of PhCO<sub>2</sub><sup>-</sup>, **1** + 1 eq. of H<sub>2</sub>PO<sub>4</sub><sup>-</sup>, **1** + 1 eq. of HSO<sub>4</sub><sup>-</sup>, **1** + 1 eq. of HCO<sub>3</sub><sup>-</sup>, **1** + 1 eq. of NO<sub>3</sub><sup>-</sup>, **1** + 1 eq. of N<sub>3</sub><sup>-</sup>, **1** + 1 eq. of SCN<sup>-</sup>, **1** + 1 eq. of CN<sup>-</sup>, **1** + 2 eqs. of CN<sup>-</sup>, **1** + 1 eq. of I<sup>-</sup>.

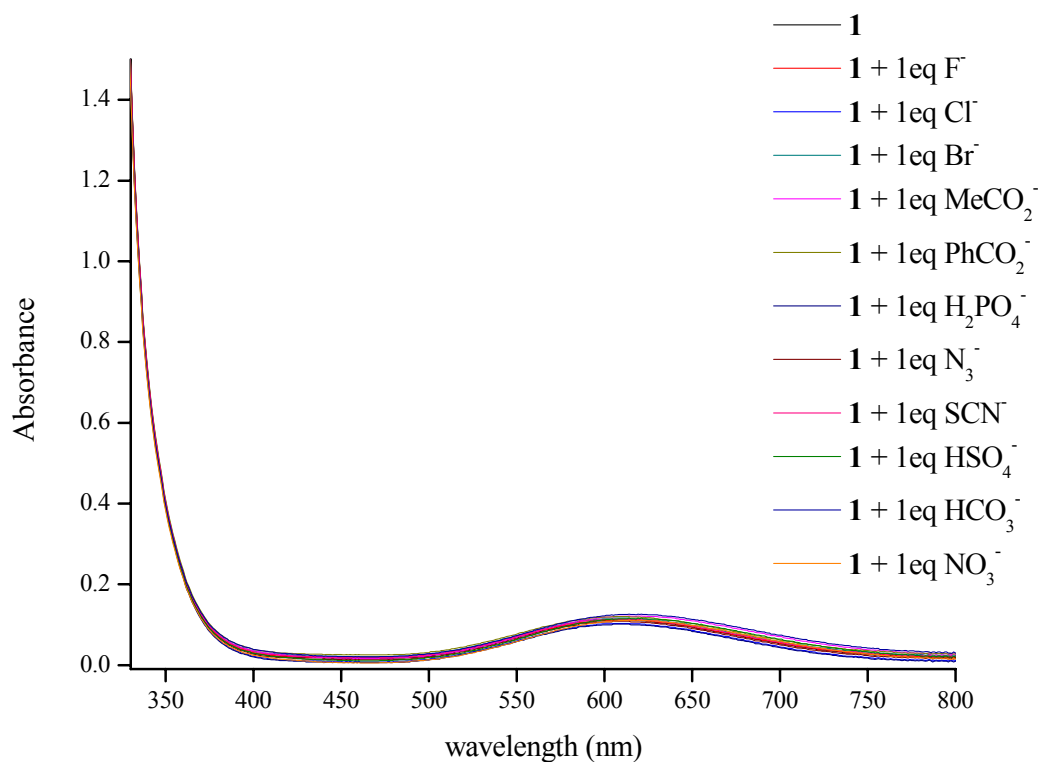

**Figure S6.** Absorption changes of **1** ( $1.00 \times 10^{-3}$  M) in MeCN upon addition 1 equiv. of all ions considered except I<sup>-</sup> and CN<sup>-</sup>.

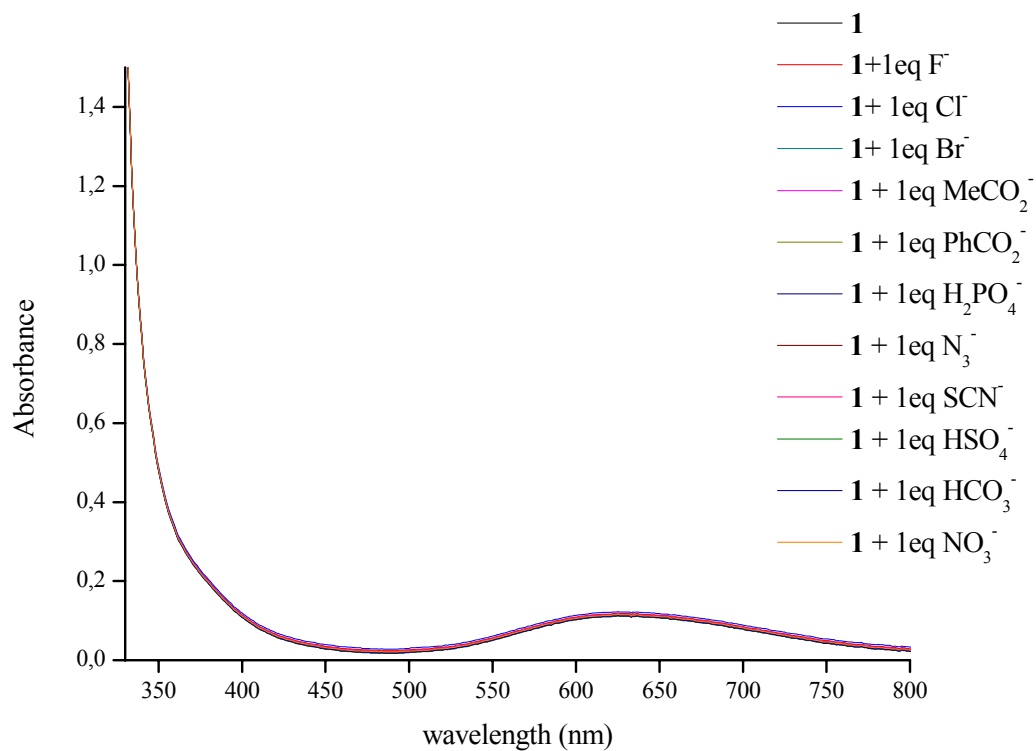

**Figure S7.** Absorption changes of **1** ( $1.00 \times 10^{-3}$  M) in H<sub>2</sub>O upon addition of 1 equiv. of all ions considered except I<sup>-</sup> and CN<sup>-</sup>.



A Dual sensor is normally defined as a supramolecular system which uses two different transducer approaches for identifying the targeted species. Borrowing from this, we have defined **1** as a “solvent-based dual sensor” because it can identify the target species in two different solvents. Alternatively, adopting the Boolean logic language, we can say that **1** performs the logical OR operation if the nature of the sensed anions ( $I^-$ ,  $CN^-$ ) and the solvents (MeCN,  $H_2O$ ) are considered as inputs and what ever colour change as output (see truth below).

Truth table of the OR operation performed by **1** on solvents ( $H_2O$ , MeCN) and anions ( $I^-$ ;  $CN^-$ ) inputs

| Outputs                                        | Inputs               |                    |
|------------------------------------------------|----------------------|--------------------|
|                                                | Solvent <sup>a</sup> | anion <sup>b</sup> |
| 0 (no colour change of <b>1</b> )              | 0                    | 0                  |
| 1 (colour change to green of <b>1</b> )        | 1                    | 0                  |
| 1 (colour change to blue of <b>1</b> )         | 0                    | 1                  |
| 1 (colour change to blue or pink of <b>1</b> ) | 1                    | 1                  |

<sup>a</sup>  $H_2O$  (0); MeCN (1)

<sup>b</sup>  $I^-$  (0);  $CN^-$  (1)
